# Supplementary material for: A multi-modal deep language model for contaminant removal from metagenome-assembled genomes
Source: Springer Nature journal article supplement (doi:10.1038/s42256-024-00908-5), 2024-10-07
Supplement: 42256_2024_908_MOESM1_ESM.pdf [file 42256_2024_908_MOESM1_ESM.pdf]

# **A multi-modal deep language model for contaminant removal from metagenome-assembled genomes**

---

In the format provided by the authors and unedited

---

# 1 Supplementary Notes

2

## 3 1 Analysis of MAG abundances with both high and low levels of contami- 4 nation

5 We randomly selected MAGs with high levels of contamination (completeness  $\geq 50\%$  and contami-  
6 nation  $> 10\%$ ) and randomly selected 1,000 MAGs with low levels of contamination (completeness  
7  $\geq 50\%$  and contamination  $\leq 10\%$ ) from the human fecal dataset that were binned with MetaBAT2.  
8 MAG abundance estimation was conducted by mapping reads to MAG contigs. The reads per kilobase  
9 per million mapped read (RPKM) for these MAGs were calculated.

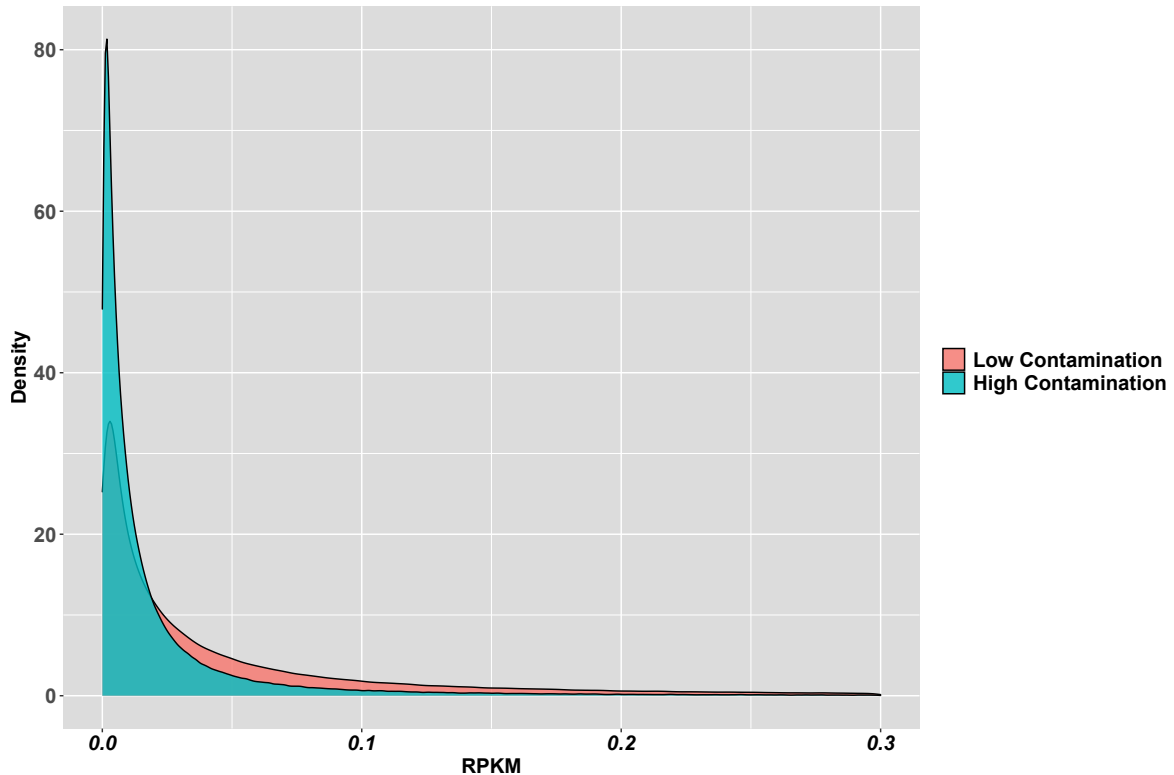

**Supplementary Figure 1:** Density distribution of RPKM for MAGs with high and low contamination

10 The density distribution of RPKM for MAGs with high and low contamination exhibited signif-  
11 icant overlap, as depicted in **Supplementary Figure 1**. This suggests that some MAGs with high  
12 abundances might not be suitable for further analysis due to contamination, potentially resulting in  
13 the exclusion of MAGs that have significant associations with some diseases.

## 2 Analysis of the annotation of contigs in highly contaminated MAGs

We randomly selected 1,110 highly contaminated MAGs (completeness  $\geq 50\%$  and contamination  $> 10\%$ ) from the human fecal dataset, which were assembled and binned using metaSPAdes and MetaBAT2. We utilized Kraken2 [1] with a standard database to annotate the contigs in these MAGs.

We identified the taxon with the highest number of contigs as the core taxon, while the remaining taxa were considered contaminated at each taxonomic rank (from phylum to species). The contamination rate at each taxonomic rank was assessed by calculating the rate of contigs belonging to contaminated taxa to the total number of annotated contigs.

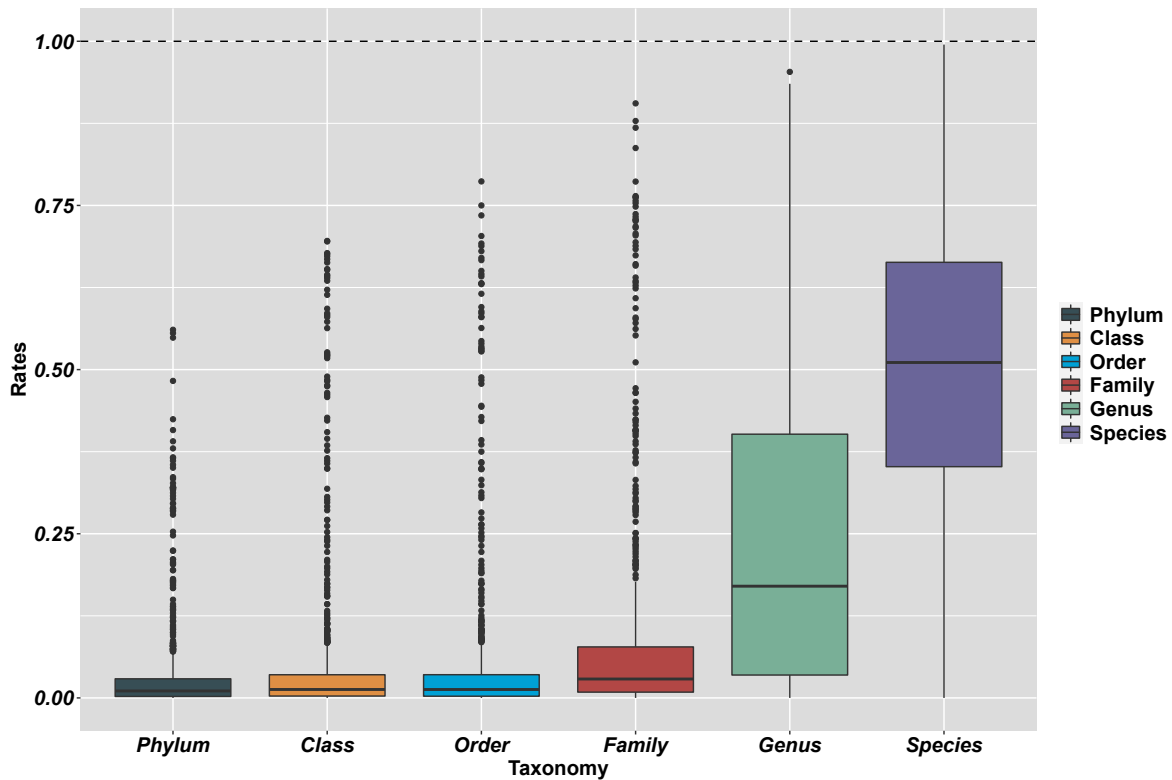

**Supplementary Figure 2:** Estimated contamination rates in six taxonomic ranks ( $n = 1,100$ ). All the box plots depict the median (horizontal line inside box), 25th and 75th percentiles (box), and 25th or 75th percentiles  $\pm 1.5 \times$  interquartile range (whiskers). The other points are outliers.

Supplementary Figure 2 clarifies that contamination mostly did not occur at higher taxonomic ranks such as phylum, class, and order but became more concentrated at lower taxonomic ranks, including family, genus, and species.

### 3 Averaged precision and recall for MAGpurify, MDMcleaner, and Deepurify on $SIM_1$

We assessed the precision and recall for three MAG decontamination methods MAGpurify, MDMcleaner, and Deepurify, using the  $SIM_1$  simulated testing set. Contaminated contigs were classified as positive labels and core contigs as negative labels. We calculated balanced precision and recall to account for the label imbalance in the simulated MAG, where core and contaminated contigs had unequal counts; this involved assigning higher weights to contaminated contigs, adjusted based on the rate between the number of core contigs and contaminated contigs within a simulated MAG. **Supplementary Table 1** summarizes the precision and recall values for each MAG decontamination method.

| $LCA(c, t)$ | Contamination Rate: 5%  |        |            |        |           |        | Contamination Rate: 10% |        |            |        |           |        |
|-------------|-------------------------|--------|------------|--------|-----------|--------|-------------------------|--------|------------|--------|-----------|--------|
|             | MAGpurify               |        | MDMcleaner |        | Deepurify |        | MAGpurify               |        | MDMcleaner |        | Deepurify |        |
|             | Precision               | Recall | Precision  | Recall | Precision | Recall | Precision               | Recall | Precision  | Recall | Precision | Recall |
| Kingdom     | 0.921                   | 0.592  | 0.991      | 0.988  | 0.996     | 0.996  | 0.980                   | 0.577  | 0.998      | 0.993  | 0.997     | 0.997  |
| Phylum      | 0.877                   | 0.312  | 0.997      | 0.992  | 0.990     | 0.989  | 0.961                   | 0.344  | 0.997      | 0.984  | 0.991     | 0.991  |
| Class       | 0.895                   | 0.256  | 0.998      | 0.936  | 0.981     | 0.980  | 0.890                   | 0.271  | 0.997      | 0.961  | 0.978     | 0.977  |
| Order       | 0.891                   | 0.158  | 0.978      | 0.700  | 0.940     | 0.931  | 0.961                   | 0.220  | 0.998      | 0.710  | 0.971     | 0.967  |
| Family      | 0.865                   | 0.094  | 0.918      | 0.480  | 0.953     | 0.946  | 0.916                   | 0.154  | 0.853      | 0.293  | 0.931     | 0.913  |
| Genus       | 0.781                   | 0.113  | 0.875      | 0.216  | 0.897     | 0.871  | 0.871                   | 0.082  | 0.879      | 0.174  | 0.897     | 0.869  |
| $LCA(c, t)$ | Contamination Rate: 15% |        |            |        |           |        | Contamination Rate: 20% |        |            |        |           |        |
|             | MAGpurify               |        | MDMcleaner |        | Deepurify |        | MAGpurify               |        | MDMcleaner |        | Deepurify |        |
|             | Precision               | Recall | Precision  | Recall | Precision | Recall | Precision               | Recall | Precision  | Recall | Precision | Recall |
| Kingdom     | 0.976                   | 0.424  | 0.999      | 0.995  | 0.996     | 0.996  | 0.958                   | 0.385  | 0.996      | 0.996  | 0.994     | 0.994  |
| Phylum      | 0.952                   | 0.221  | 0.992      | 0.974  | 0.990     | 0.989  | 0.906                   | 0.294  | 0.991      | 0.987  | 0.990     | 0.990  |
| Class       | 0.881                   | 0.226  | 0.998      | 0.952  | 0.973     | 0.970  | 0.955                   | 0.206  | 0.998      | 0.960  | 0.961     | 0.958  |
| Order       | 0.926                   | 0.138  | 0.976      | 0.779  | 0.962     | 0.958  | 0.947                   | 0.186  | 0.977      | 0.792  | 0.965     | 0.961  |
| Family      | 0.879                   | 0.163  | 0.839      | 0.328  | 0.928     | 0.922  | 0.960                   | 0.107  | 0.879      | 0.482  | 0.929     | 0.917  |
| Genus       | 0.851                   | 0.050  | 0.773      | 0.118  | 0.866     | 0.825  | 0.907                   | 0.083  | 0.880      | 0.138  | 0.852     | 0.822  |

**Supplementary Table 1:** Averaged precision and recall for MAGpurify, MDMcleaner, and Deepurify on  $SIM_1$  simulated testing set.

The table shows that Deepurify consistently achieves significantly higher precision and recall than MAGpurify and MDMcleaner, especially when contamination occurs at the family, genus, and species taxonomic ranks. These results highlight Deepurify’s effectiveness in removing a substantial portion of contaminated contigs while preserving clean contigs.

### 4 Deepurify’s performance and community complexity

We used Nonpareil to quantify the community complexity of the real-word metagenomic sequencing datasets, including 7 soil samples, 3 plant samples, 3 freshwater samples, 3 ocean samples (1021520, 1021523, 1021526), six human fecal samples (C0001, C0004, HC0006, HK0023, K0031, K0032). We plotted the community complexity (diversity) of each sample against the improvement of quality scores and the increased number of high-quality MAGs using Deepurify\_Iter in **Supplementary Figure 3**.

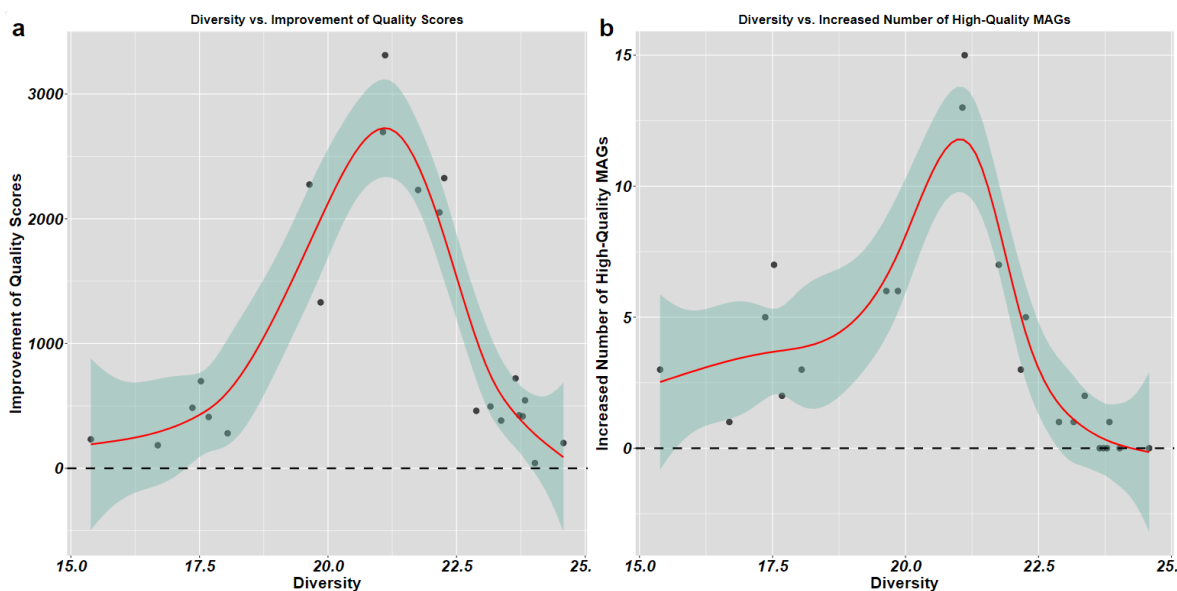

**Supplementary Figure 3:** (a). Diversity of each sample and improvement of MAG quality scores by Deepurify\_Iter. The red curve was generated using the generalized additive model (GAM) on the improvement of quality scores for MAGs and diversity of samples. (b). Diversity of each sample and the increased number of high-quality MAGs by Deepurify\_Iter. The red curve was generated using the GAM on the increased number of high-quality MAGs and diversity of samples. The error bands represent the 95% confidence interval for the GAM curve.

## 5 Sequence augmentation

We proposed several simple data augmentation strategies for the target sequences.

- **Insertions:** We randomly generated a nucleotide sequence by concatenating A, T, C, and G with equal probabilities. The length of this generated sequence was in the range of 20% - 40% of the target sequence's length, following a uniform distribution. The insertion of the generated sequence occurred as follows: it was either not inserted or inserted at either the beginning or end of the target sequence with corresponding probabilities of 0.5, 0.25, and 0.25, respectively.
- **Mutations:** Each base pair in the target sequence had a 0.01 probability of being replaced by one of the other three nucleotides, with equal probabilities for each nucleotide.

## 6 Advantage of GTDB's taxonomic lineage for training Deepurify

We trained Deepurify on representative microbial genomes using both NCBI and GTDB taxonomic lineages. Our findings suggested that utilizing GTDB's taxonomic lineage could significantly improve Deepurify's performance on simulated data ( $SIM_1$ , Wilcoxon Signed-Rank Sum test, two-sided, p-value = 1.192e-07, 95 percent confidence interval = [0.023, 0.041], effect size statistic = 0.303). We further designed a strategy to improve the performance of Deepurify by selecting the sequences with low similarity from the representative genomes. It included two steps: 1. split the representative

61 genomes into sequences of length 8,192 bps with 512 bps overlap; 2. Apply MMSeqs2 to group these  
62 sequences and only select the representative sequences from each cluster ( $SIM_1$ , Wilcoxon Signed-  
63 Rank Sum test, two-sided, p-value = 1.192e-07, 95 percent confidence interval = [0.089, 0.144], effect  
64 size statistic = 1.29). **Supplementary Table 2** presents the averaged balanced macro F1-scores for  
65 Deepurify trained under different conditions: with NCBI’s taxonomic lineages, GTDB’s taxonomic  
66 lineages, and GTDB’s lineages using MMseqs2 clustering.

| $LCA(c, t)$ | Contamination Rate: 5%  |       |                | Contamination Rate: 10% |       |                |
|-------------|-------------------------|-------|----------------|-------------------------|-------|----------------|
|             | NCBI                    | GTDB  | GTDB & MMseqs2 | NCBI                    | GTDB  | GTDB & MMseqs2 |
| Kingdom     | 0.969                   | 0.970 | 0.996          | 0.976                   | 0.983 | 0.997          |
| Phylum      | 0.927                   | 0.944 | 0.991          | 0.929                   | 0.944 | 0.989          |
| Class       | 0.880                   | 0.909 | 0.980          | 0.858                   | 0.911 | 0.977          |
| Order       | 0.806                   | 0.834 | 0.930          | 0.832                   | 0.880 | 0.967          |
| Family      | 0.750                   | 0.820 | 0.945          | 0.740                   | 0.798 | 0.910          |
| Genus       | 0.683                   | 0.722 | 0.865          | 0.657                   | 0.725 | 0.863          |
| $LCA(c, t)$ | Contamination Rate: 15% |       |                | Contamination Rate: 20% |       |                |
|             | NCBI                    | GTDB  | GTDB & MMseqs2 | NCBI                    | GTDB  | GTDB & MMseqs2 |
| Kingdom     | 0.971                   | 0.981 | 0.996          | 0.972                   | 0.972 | 0.994          |
| Phylum      | 0.929                   | 0.944 | 0.989          | 0.928                   | 0.948 | 0.991          |
| Class       | 0.862                   | 0.880 | 0.970          | 0.867                   | 0.889 | 0.957          |
| Order       | 0.812                   | 0.865 | 0.957          | 0.842                   | 0.872 | 0.960          |
| Family      | 0.757                   | 0.803 | 0.917          | 0.726                   | 0.779 | 0.915          |
| Genus       | 0.625                   | 0.661 | 0.813          | 0.627                   | 0.647 | 0.814          |

**Supplementary Table 2:** Averaged balanced macro F1-score across various contamination rates, along with the LCA of core and contaminated genomes at different taxonomic ranks on SIM1. The training sets were constructed based on NCBI’s taxonomy, GTDB’s taxonomy, and GTDB’s taxonomy followed by MMseqs2 clustering.

## 67 7 Sequence embedding method

68 We performed sequence embedding using both one-hot embedding and k-mer embeddings and then  
69 merged them to form a unified matrix. In the one-hot embedding procedure, we included two special  
70 tokens: “ $X$ ” to indicate padding applied at the sequence’s end to ensure consistent input length within  
71 a mini-batch, and “ $N$ ” to represent any unidentified characters. Consequently, the one-hot embedding  
72 generated a matrix sized  $L \times 6$  for each sequence, with  $L$  representing the sequence length.

73 We have integrated k-mer embedding into our sequence embedding approach. First, we created a  
74 look-up table where each row represents a unique k-mer token and its corresponding ID. This table  
75 included two special tokens: the [PAD] token for padding sequences of varying lengths and [UNK] to  
76 signify any unidentified k-mer tokens within the sequences. Next, we split the sequence into k-mer  
77 tokens and converted them to IDs using the look-up table. Finally, a trainable matrix within the

78 embedding layer mapped the k-mer token ID to a dense vector with  $d_m(k\text{-mer})$  dimensions. In this  
 79 study, we used both 3-mer and 4-mer token embeddings to represent the input sequences, with the  
 80 dimensions set at  $d_m(3\text{-mer}) = 16$  and  $d_m(4\text{-mer}) = 32$ , respectively.

81 We combined the one-hot, 3-mer, and 4-mer embeddings of the sequence with those of its reverse  
 82 complement using the same embedding methods. This fusion resulted in a unified matrix that effec-  
 83 tively represents the input sequence. The unified matrix has a fixed dimension of  $L \times 108$ , with  $L$   
 84 representing the sequence length. This approach provides a comprehensive and enriched representation  
 85 of the input sequences, enhancing the robustness and effectiveness of our model.

## 86 8 Architecture of modified UniFormer

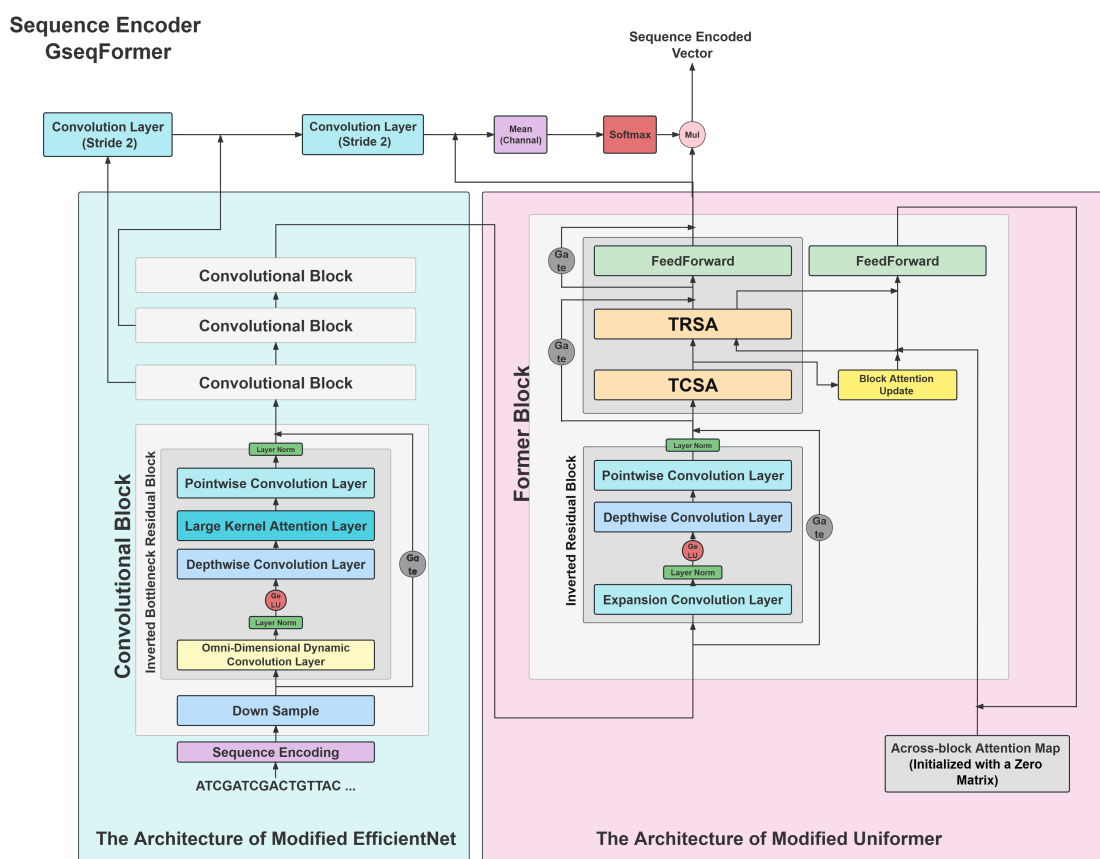

**Supplementary Figure 4:** The GseqFormer architecture comprises two essential components. The segment shown on the left utilizes a modified EfficientNet architecture to compress sequence length, while that on the right uses a modified UniFormer architecture with four distinct attention mechanisms designed to capture intricate taxonomic patterns within complex DNA sequences.

87 We replaced the dynamic position embedding (DPE) blocks in UniFormer with the inverted residual  
 88 blocks (IRB) designed from MobileNet V2 [2]. The DPE layer has a limited number of parameters  
 89 and is less effective at handling complex sequences on its own. Therefore, we substituted it with the  
 90 IRB, which has more trainable parameters to enhance the model's capability to process complex DNA

91 sequences.

92 The multi-head relation aggregator blocks in UniFormer have been replaced with tensor column-wise  
93 and row-wise gated self-attention modules (TCSA, **Supplementary Figure 5** and TRSA, **Supple-**  
94 **mentary Figure 6**), modified from the Evoformer architecture. TRSA and TCSA are designed to  
95 improve the model’s capacity to capture taxonomic patterns within complex DNA sequences by inte-  
96 grating four distinct attention mechanisms for their input tensor ( $\psi$ ), which represents the sequence  
97 embedding. The four attention mechanisms are as follows: (1) **Embedding attention**: This mecha-  
98 nism evaluates the attention scores assigned to different embedding approaches for each nucleotide in  
99 the sequence. (2) **Nucleotide attention**: This mechanism captures interactions between nucleotides  
100 in a sequence, similar to the self-attention mechanism in the Transformer model. (3) **Across-block at-**  
101 **tention**: This mechanism links nucleotide interaction knowledge learned from different Former blocks,  
102 enabling the model to capture nucleotide interrelationships across these blocks. (4) **Spatial atten-**  
103 **tion**: This mechanism extracts local spatial contexts from the attention map generated by nucleotide  
104 attention.

105 Both TCSA and TRSA have an input sequence embedding tensor  $\psi \in \mathbf{R}^{L \times C}$  with two dimensions:  
106 sequence length ( $L$ ), and channel ( $C$ ). Initially, we partitioned the channel dimension  $C$  into three equal  
107 segments in these two modules, resulting in a three-dimensional tensor denoted as  $\psi_d$ , with dimensions  
108  $[3, L, d_k]$ , where  $d_k$  is the value obtained by dividing  $C$  by 3. These dimensions correspond to the  
109 number of embedding methods, the sequence length, and the channel dimension for the corresponding  
110 embedding method. This reshaped configuration allows  $\psi$  to have an extra dimension to simultaneously  
111 represent three distinct embedding methods (one-hot, 3-mer, and 4-mer; refer to **Supplementary**  
112 **Note 7**) for a given sequence enabling the application of embedding attention to this dimension.

113 In the TCSA module, embedding attention was applied to  $\psi_d$ , focusing specifically on its first  
114 dimension, which represents the number of embedding approaches for a sequence. We denoted the  
115 dense vector at the  $l$ -th token of  $\psi_d$  as  $v_e \in \mathbf{R}^{3 \times d_k}$ . The embedding attention map  $\rho_e \in \mathbf{R}^{3 \times 3}$  can be  
116 calculated as follows:

$$\rho_e = \frac{Q_e K_e^T}{\sqrt{d_k}} \quad \text{where} \quad Q_e = v_e W_e^Q, K_e = v_e W_e^K \quad (1)$$

117 where  $W_e^Q \in \mathbf{R}^{d_k \times d_k/h}$ ,  $W_e^K \in \mathbf{R}^{d_k \times d_k/h}$ , and  $h$  is the number of heads. Embedding attention  
118 effectively captures interactions among different embedding approaches within the sequence and dy-  
119 namically assigns attention scores to these methods for each token in  $\psi_d$ .

120 In the TRSA module, nucleotide attention was applied to  $\psi_d$ , focusing specifically on its second



121 dimension, which represents the sequence length. We denoted the dense vector at the  $e$ -th embedding  
 122 technique of  $\psi_d$  as  $v_n \in \mathbf{R}^{L \times d_k}$ . The nucleotide attention map  $\rho_n \in \mathbf{R}^{L \times L}$  can be calculated as follows:

$$\rho_n = \frac{Q_n K_n^T}{\sqrt{d_k}}, \quad \text{where } Q_n = v_n W_n^Q, K_n = v_n W_n^K$$

123 where  $W_n^Q \in \mathbf{R}^{d_k \times d_k/h}$  and  $W_n^K \in \mathbf{R}^{d_k \times d_k/h}$ . This attention mechanism effectively captures interac-  
 124 tions among nucleotides within the sequence and assigns dynamic attention scores to each token in  
 125  $\psi_d$ .

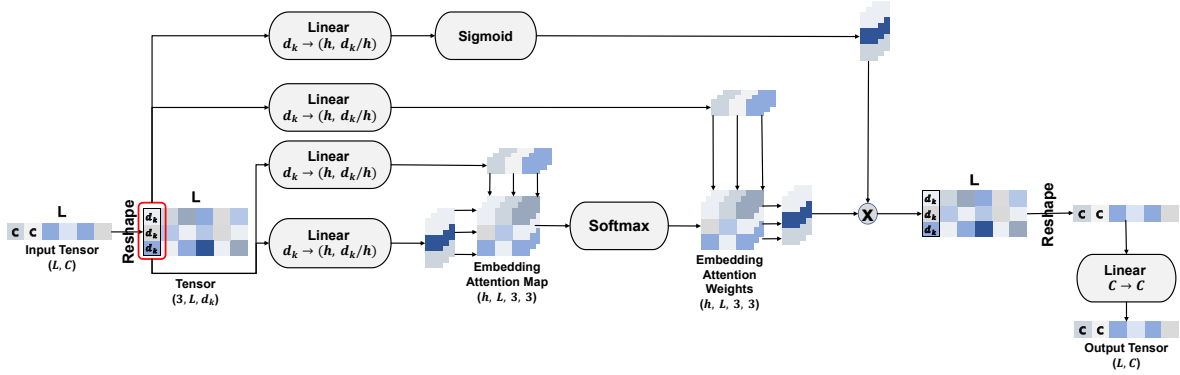

**Supplementary Figure 5:** Tensor Column-wise gated Self-Attention (TCSA). Dimensions:  $L$ : sequence length,  $C$ : channels,  $d_k$ : channels after reshape,  $h$ : heads.

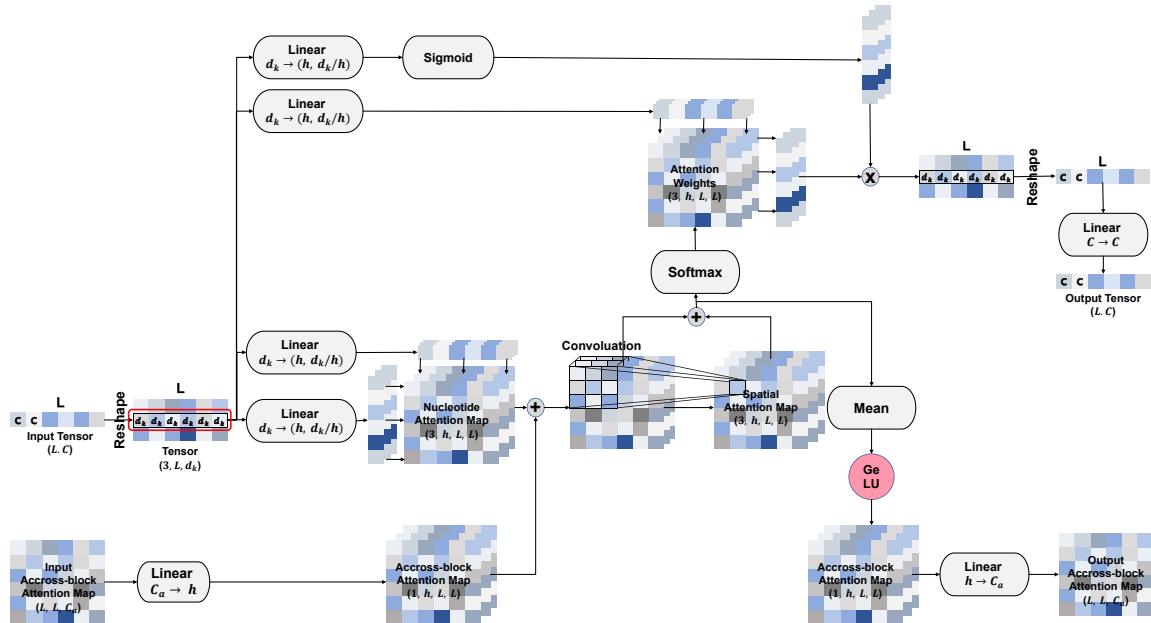

**Supplementary Figure 6:** Tensor Row-wise gated Self-Attention (TRSA). Dimensions:  $L$ : sequence length,  $C$ : channels for tokens,  $d_k$ : channels for tokens after reshape,  $C_a$ : channels for across-block attention map,  $h$ : heads.

126 We incorporated the across-block attention mechanism into the TRSA module to facilitate con-

127 nections between the learned knowledge of nucleotide interactions across different blocks. Initially,  
 128 the across-attention map ( $\rho_a \in \mathbf{R}^{L \times L \times C_a}$ ) was set as a zero matrix. Then,  $\rho_a$  was updated (added)  
 129 through the block attention update (BAU) module (**Supplementary Figure 7**) based on the TCSA  
 130 output. Subsequently, the updated  $\rho_a$  was fed into TRSA. After a linear transformation, it was added  
 131 to  $\rho_n$  to serve as an additional nucleotide interaction attention map derived from previous blocks. Fur-  
 132 ther refinement of  $\rho_a$  was achieved through a subsequent feedforward module. The implementation of  
 133 the across-block attention mechanism facilitates the sharing and propagation of nucleotide interaction  
 134 knowledge learned within individual blocks across different parts of the model.

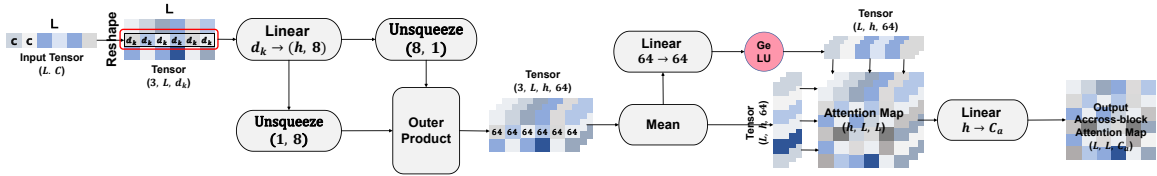

**Supplementary Figure 7:** Block Attention Update (BAU) module. Dimensions:  $L$ : sequence length,  $C$ : channels for tokens,  $d_k$ : channels for tokens after reshape,  $C_a$ : channels for across-block attention map,  $h$ : heads.

135 Transformer-based models are known for their ability to capture the global context of a sequence  
 136 but they may struggle with capturing its local context [3]. To address this limitation, we extended  
 137 the nucleotide attention map and across-block attention map by incorporating spatial attention. We  
 138 treated the sequence as an image and applied a convolutional layer to extract local spatial context  
 139 from  $\rho_n + Linear(\rho_a)$ , resulting in a spatial attention map denoted as  $\rho_s$ . In the TRSA module,  $\rho_s$   
 140 was incorporated into  $\rho_n + Linear(\rho_a)$  as a local context attention map to improve the model’s ability  
 141 to capture and comprehend the local context within a given sequence.

## 142 9 Architecture of modified EfficientNet

143 We made three changes to the EfficientNet architecture[4]. First, we substituted the expansion convo-  
 144 lutional layers present in inverted bottleneck residual blocks (IBRB) with omni-dimensional dynamic  
 145 convolution [5], which has been shown to achieve higher accuracy than static convolutions [5]. Sec-  
 146 ond, we replaced the squeeze and excitation blocks [6] in IBRB with the large kernel attention layers  
 147 [7] to calculate token-wise and channel-wise attention scores for sequence embeddings. Third, we  
 148 incorporated DeepNorm [8] to prevent gradient vanishing during model training.

## 149 10 Strategy for generating negative taxonomic lineages during training

150 We denoted  $T_{k_i} = [\leq t_{k_i}]$  as the prefix of taxonomic lineage  $T_i$  before  $k_i$  rank, where  $k_i \in \{phylum, class,$   
 151  $order, family, genus, species\}$ . During training,  $k_i$  was randomly selected, and we treated  $T_{k_i}$  as the

152 positive taxonomic lineage for sequence  $s_i$ .

153 We denote the negative taxonomic lineage as  $T_{k_j}$ . During contrastive training, we select 199  
154 negative taxonomic lineages from the taxonomic tree. The half-number of negative taxonomic lineages  
155 have three characteristics: 1.  $k_i = k_j$ , 2.  $[\langle t_{k_i} \rangle] = [\langle t_{k_j} \rangle]$ , 3.  $t_{k_i} \neq t_{k_j}$ . The remaining half of these  
156 negative lineages are randomly drawn from the taxonomic tree, ensuring they are distinct with  $T_{k_i}$ .  
157 This generation method is pivotal in Deepurify’s contrastive training process, where  $T_{k_j}$  with the three  
158 specified characteristics act as hard negative samples, increasing the contrastive training difficulty and  
159 enhancing model performance [9].

## 160 11 Solving the imbalanced phyla classes in $GS_c$ and $GS_p$

161 In our data processing pipeline, we incorporated an oversampling strategy to mitigate the issue of  
162 imbalanced phyla observed in  $GS_c$  and  $GS_p$ . This imbalance problem was caused by the varying  
163 number of species present across different phyla. The oversampling approach involved duplicating  
164 genomes within a phylum until the total number of genomes from that phylum reached a predefined  
165 threshold, specifically a minimum of 500 for  $GS_c$  and 20 for  $GS_p$ . This strategy was only applied to  
166 the phylum containing fewer than 500 and 20 species, respectively.

167 Furthermore, we adopted the focal loss [10] in the training stage to address the issue of label  
168 imbalance in the other taxonomic ranks. This additional measure enhanced our model’s robustness to  
169 imbalanced data distributions.

## 170 12 Hyper-parameter setting for training

171 We applied the following hyper-parameters for training Deepurify, similar to the training configuration  
172 of UniFormer. Specifically, we set the stochastic depth rate [11] at 0.01 for the EfficientNet and set the  
173 dropout rate [12] to 0.08. We set the weight decay, learning rate, batch size, and number of negative  
174 lineages for contrastive learning as  $1e^{-5}$ ,  $1e^{-6}$ , 10, and 199, respectively. Training Deepurify involved  
175 utilizing the AdamW optimizer [13] in conjunction with a cosine learning rate schedule [14], spanning  
176 a training period of 96 epochs. The initial 4 epochs were used for linear warm-up.

177 Subsequently, we fine-tuned Deepurify to minimize the influence of homologous sequences during  
178 training. The basic parameters remain unchanged, except setting stochastic depth rate and dropout as  
179 0. The taxonomic encoder (LSTM) parameter was fixed, and only 15 epochs were used for fine-tuning.  
180  $L_{ST}$  was replaced with cross-entropy loss but not focal loss. To mitigate the impact of homologous  
181 sequences on the model, we computed the loss  $L_{ST}$  for a given sequence  $s_i$  only within the context of  
182 contrastive training if the absolute difference between the top-1 and top-2 predicted probabilities of  
183 lineages exceeded 0.05.

### 184 **13 Determining the number of clusters with SCGs**

185 We used Prodigal and the HMM tool to identify SCGs, resulting in a comprehensive list that matched  
186 contigs with their corresponding SCGs. We then sorted the contigs in descending order of length and  
187 assigned them to sets one by one, while recording the SCGs in each set. If we encountered duplicate  
188 SCGs within a set while adding a contig, we created a new set for that contig. This iterative process  
189 continued until all contigs were placed in different sets, resulting in multiple divisions. The number of  
190 clusters is equal to the number of divisions minus one.

### 191 **14 Traversing the MAG-separated tree with DFS**

192 To maximize the number of medium- and high-quality MAGs, Deepurify used post-order traversal to  
193 traverse the MAG-separated tree. Each node maintained a list to store its binning outcomes. The  
194 current node being traversed is referred to as  $V_C$ .  $V_{H-}$  and  $V_{M-}$  are the child nodes of  $V_C$ .  $V_{H-}$   
195 must contain high-quality MAGs, while  $V_{M-}$  should not contain high-quality MAGs but must include  
196 medium-quality MAGs. We used **Algorithm 1** to compare and select nodes. The comparison and  
197 selection process occurs recursively, starting from the left nodes and progressing up to the root node,  
198 resulting in a collection of nodes stored in the list of the root node.

### 199 **15 Running time distribution**

200 We evaluated the running time distributions of each step in Deepurify.Iter (**Supplementary Figure**  
201 **8, a**) on CAMI I High complexity datasets and real-world metagenomic sequencing data (a soil sample  
202 (SRR25158210), a plant sample (SRR14308228), an ocean sample (1102224), a Human Fecal (IBS-D)  
203 sample (K0273), a freshwater sample (SRR26420192)) and showed the running time in **Supplemen-**  
204 **tary Figure 8**. The hardware used in this experiment included: 1. CPU: AMD EPYC 7742 64-Cores  
205 Processor (2 Sockets); 2. RAM: 1TB; 3. GPU: 8 x A100-40GB GPUs. We observed that CheckM2  
206 was no longer the bottleneck of Deepurify and the running time was dominated by the contig binning  
207 step.

208 We further analyzed the runtime distributions of different steps in Deepurify when applied to the  
209 outputs of CONCOCT (**Supplementary Figure 8b**), MetaBAT2 (**Supplementary Figure 8c**), and  
210 SemiBin2 (**Supplementary Figure 8d**) on the same real-world metagenomic sequencing datasets.  
211 The experiments were performed using the following hardware: 1. CPU: Intel(R) Xeon(R) Silver 4114,  
212 10-Core Processor; 2. RAM: 512GB; 3. GPU: 2 x V100-32GB GPUs. The assignment of taxonomic  
213 lineages to contigs was found to be the most time-consuming step.

---

**Algorithm 1** The comparison and selection of nodes

---

```
1: Input: A  $V_{M\_}$  node list :  $L_M = [V_{M_1}, \dots, V_{M_m}]$ ,  
2: Input: A  $V_{H\_}$  node list:  $L_H = [V_{H_1}, \dots, V_{H_h}]$ ,  
3: Input: The node that DFS is currently traversing:  $V_C$ .  
4: func: summedQualityScores is a function to calculate the summed quality score of MAGs in a  
   node list; getHighQualityNum, getMediumQualityNum are the functions to get the number  
   of high-, medium-quality MAGs from a node list.  
5: Output: None.  
6: function comparison( $L_M, L_H, V_C$ ):  
7:   curNodeRes =  $V_C$ .binningResList  
8:    $h = \text{getHighQualityNum}(\text{curNodeRes})$   
9:    $m = \text{getMediumQualityNum}(\text{curNodeRes})$   
10:   $h_c = \text{size}(L_H)$   
11:   $m_c = \text{size}(L_M)$   
12:   $qsSum = \text{summedQualityScores}(\text{curNodeRes})$   
13:   $qsSum_c = \text{summedQualityScores}(L_M) + \text{summedQualityScores}(L_H)$   
14:  if  $h > h_c$ :  
15:    return  
16:  elif  $h == h_c$ :  
17:    if  $m > m_c$ :  
18:      return  
19:    elif  $m == m_c$ :  
20:      if  $qsSum > qsSum_c$ :  
21:        return  
22:      else:  
23:         $V_C$ .binningResList =  $L_H + L_M$   
24:    else:  
25:       $V_C$ .binningResList =  $L_H + L_M$   
26:  else:  
27:     $V_C$ .binningResList =  $L_H + L_M$ 
```

---

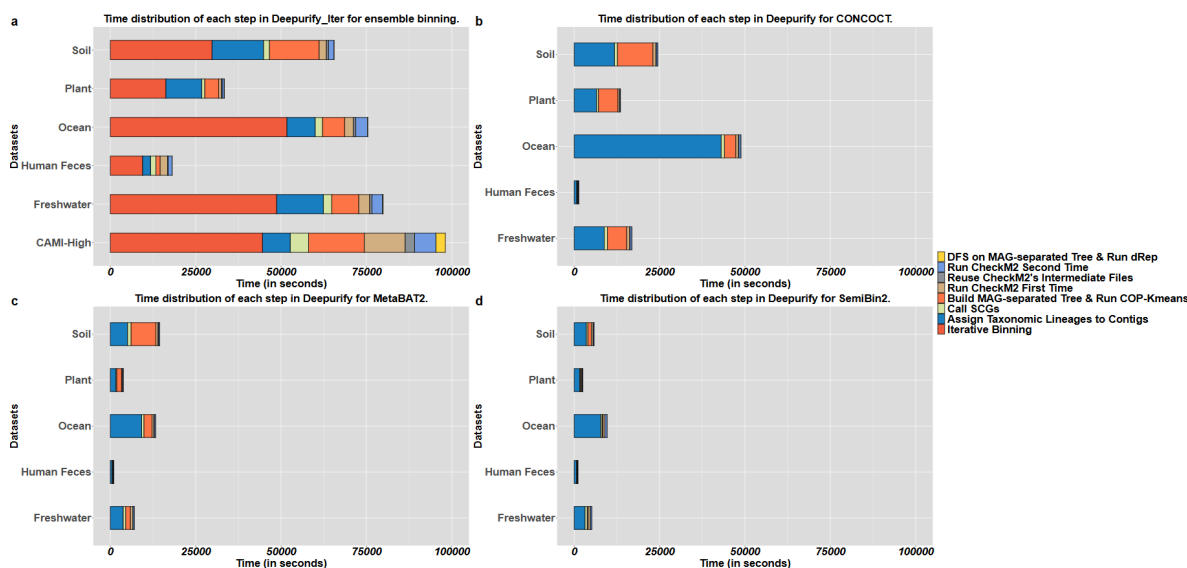

**Supplementary Figure 8:** (a). Running time distributions (in seconds) for the different steps in Deepurify\_Iter (a) and Deepurify (b-d). (a) Running time distribution of Deepurify\_Iter on metagenomic sequencing data from soil (SRR25158210), plant (SRR14308228), ocean (1102234), human feces (K0273), freshwater (SRR26420192), and CAMI I High complexity datasets. (b-d) Running time distributions of Deepurify applied to the results from CONCOCT (b), MetaBAT2 (c), and SemiBin2 (d) on five real-world metagenomic sequencing data. ‘Iterative Binning’ refers to running CONCOCT, MetaBAT2, and SemiBin2. ‘Assign Taxonomic Lineages to Contigs’ involves calculating contig embeddings and identifying their taxonomic lineages. ‘Call SCGs’ refers to using Prodigal and HMMER for identifying SCGs in MAGs. ‘Build MAG-separated Tree & Run COP-Kmeans’ includes constructing MAG-separated trees and implementing COP-Kmeans for each node within these trees. ‘Run CheckM2 First Time’ is the application of CheckM2 to assess MAGs’ quality. ‘Reuse CheckM2’s Intermediate Files’ entails employing intermediate files from CheckM2, such as Prodigal and DIAMOND outputs to build intermediate files for sub-MAGs. ‘Run CheckM2 Second Time’ involves executing CheckM2 using the intermediate files prepared previously. ‘DFS on MAG-separated tree & Run dRep’ includes performing DFS on MAG-separated trees to select the maximum number of high- and medium-quality MAGs and applying dRep to eliminate duplicate MAGs.

## 214 16 Ablation study for multi-modal model and MAG-separated tree

215 We performed two ablation studies on the CAMI High complexity dataset to investigate the necessity  
216 of using the multi-modal model (sequence embeddings) and the MAG-separated tree.

217 (Ablation Study 1) We adopted a simpler method to build the MAG-separated tree. Given a MAG,  
218 we predicted its core lineage using the score function designed for simulation experiments (**Figure 2b**).  
219 In the simplified MAG-separated tree, each taxonomic rank only includes one node that represents  
220 the corresponding value from the core lineage. We then selected sub-MAGs from the six nodes (from  
221 Phylum to Species) with the highest summation of quality scores ( $\Sigma QS(i)$ ).

222 (Ablation Study 2) We implemented an iterative greedy approach to select subsets of contigs.  
223 Initially, we calculated the average embeddings of all contigs in a MAG, which were generated by  
224 GseqFormer (from the multi-modal model). We computed the cosine distances between this average  
225 value and each contig’s embedding. The contig that was most distant from the average was removed.  
226 We then calculated the quality score based on completeness and contamination. This process was  
227 carried out repeatedly until there was no further improvement in the MAG’s quality score.

228 We compared the performance of Deeppurify\_Iter and the models from Ablation studies 1 and 2 on  
229 the CAMI I High complexity dataset (**Supplementary Table 3**). This result indicates the MAG-  
230 separated tree and the sequence embeddings from the multi-modal model in Deeppurify could generate  
231 more high-quality MAGs and improve MAG quality scores.

| <i>Ensemble<br/>Binning</i> | CAMI I High |        |          |
|-----------------------------|-------------|--------|----------|
|                             | High        | Medium | QS       |
| Pass GUNC                   |             |        |          |
| Before Decontamination      | 118         | 127    | 18849.25 |
| Ablation Study 1            | 147         | 152    | 23407.19 |
| Ablation Study 2            | 134         | 125    | 20350.36 |
| Deeppurify_Iter             | 151         | 166    | 24253.64 |

**Supplementary Table 3:** The number of high- (High) and medium-quality (Median) MAGs that passed GUNC criterion on contamination, along with the quality scores across CAMI I High datasets for ensemble baseline, two ablation experiments, and Deeppurify\_Iter. ‘Ensemble Binning’ refers to the integration of MAGs generated by CONCOCT, MetaBAT2, and SemiBin2.

## 232 17 Software versions and computational environment

233 Our study used MAGpurify (v2.1.2) and MDMcleaner (v0.8.7) for MAG decontamination. The de-  
234 velopment of Deeppurify was developed using Python (v3.8.18) along with PyTorch (v2.0.0 + cu118).  
235 The SCGs calling was executed using Prodigal (v2.6.3) and HMMER (v3.3.2). The computation of  
236 the balanced macro F1-score was performed using Scikit-Learn (v1.2.0). The evaluation of MAG  
237 quality was carried out using CheckM2 (v1.0.1). For binning, we employed CONCOCT (v1.1.0),

238 MetaBAT2 (v2.15), and SemiBin2 (v2.1.0). The annotation of MAGs was executed using GTDB-  
 239 Tk (v1.4.0). In this study, metaSPAdes (v3.15.0) and MegaHit (v1.2.9) were applied for assem-  
 240 bly. We applied MMseqs2 (v14.7e284) to cluster sequences. The GitHub link for this study is  
 241 ‘https://github.com/ericcombiolab/Deepurify/’.

242 The experiments were conducted on a compute node with two AMD EPYC 7742 processors com-  
 243 prising 64 cores (128 threads) and 1 TB of memory. Eight NVIDIA Tesla A100-40GB GPUs were  
 244 engaged to expedite the Deepurify training. During inference, the utilization was on eight Tesla A100-  
 245 40GB GPUs, with two threads allocated for data feeding on each GPU. Other MAG decontamination  
 246 tools were run with 256 threads.

## 247 18 Evaluating Deepurify’s performance on real-world metagenomic sequenc- 248 ing data by processing outputs from individual binning tools

249 We applied Deepurify to the outputs of individual binning tools (CONCOCT, MetaBAT2, and SemiBin2)  
 250 on various metagenomic sequencing datasets, including soil (7 samples), ocean (11 samples), freshwa-  
 251 ter (3 samples), plant (3 samples), and human feces (227 samples). The results (**Supplementary**  
 252 **Table 4**) show that Deepurify increased the number of high-quality MAGs across all three binning  
 253 tools, producing 3.88, 1.16, and 1.18 times more high-quality MAGs from CONCOCT, MetaBAT2,  
 254 and SemiBin2, respectively.

255 To demonstrate the effectiveness of Deepurify in significantly reducing contamination in highly  
 256 contaminated MAGs, we selected MAGs with contamination levels exceeding 10% from the original  
 257 binning results of CONCOCT, MetaBAT2, and SemiBin2 across all five real-world metagenomic se-  
 258 quencing datasets (251 samples). After processing these MAGs with Deepurify, we observed a substan-  
 259 tial reduction in contamination levels (Wilcoxon Signed-Rank Sum test, two-sided, p-value = 2.2e-16,  
 260 confidence interval: [-78.1, -75.7], effect size: -1.36; **Supplementary Figure 10**).

| <i>CONCOCT</i>         | Soil (7 Samples) |        |        | Ocean (11 Samples) |        |        | Plant (3 Samples) |        |        | Freshwater (3 Samples) |        |        | Human feces (227 Samples) |        |        |
|------------------------|------------------|--------|--------|--------------------|--------|--------|-------------------|--------|--------|------------------------|--------|--------|---------------------------|--------|--------|
|                        | High             | Medium | QS (k) | High               | Medium | QS (k) | High              | Medium | QS (k) | High                   | Medium | QS (k) | High                      | Medium | QS (k) |
| Before Decontamination | 3                | 28     | 1.60   | 13                 | 77     | 4.15   | 1                 | 13     | 0.76   | 13                     | 55     | 4.26   | 800                       | 881    | 125.22 |
| Deepurify              | 6                | 95     | 4.44   | 71                 | 453    | 23.6   | 18                | 127    | 7.46   | 51                     | 225    | 15.17  | 3080                      | 3631   | 498.48 |
| <i>MeatBAT2</i>        | Soil (7 Samples) |        |        | Ocean (11 Samples) |        |        | Plant (3 Samples) |        |        | Freshwater (3 Samples) |        |        | Human feces (227 Samples) |        |        |
|                        | High             | Medium | QS (k) | High               | Medium | QS (k) | High              | Medium | QS (k) | High                   | Medium | QS (k) | High                      | Medium | QS (k) |
| Before Decontamination | 14               | 56     | 4.16   | 71                 | 174    | 17.53  | 28                | 46     | 5.23   | 57                     | 131    | 13.26  | 2125                      | 2858   | 382.60 |
| Deepurify              | 19               | 121    | 7.20   | 88                 | 374    | 28.04  | 32                | 127    | 9.22   | 65                     | 229    | 18.96  | 2474                      | 5125   | 544.18 |
| <i>SemiBin2</i>        | Soil (7 Samples) |        |        | Ocean (11 Samples) |        |        | Plant (3 Samples) |        |        | Freshwater (3 Samples) |        |        | Human feces (227 Samples) |        |        |
|                        | High             | Medium | QS (k) | High               | Medium | QS (k) | High              | Medium | QS (k) | High                   | Medium | QS (k) | High                      | Medium | QS (k) |
| Before Decontamination | 7                | 92     | 5.05   | 82                 | 241    | 21.51  | 18                | 47     | 4.39   | 59                     | 158    | 15.15  | 2902                      | 3130   | 473.53 |
| Deepurify              | 12               | 184    | 9.12   | 99                 | 430    | 32.29  | 27                | 111    | 8.31   | 66                     | 251    | 20.55  | 3432                      | 5457   | 654.69 |

**Supplementary Table 4:** The number of high- (High) and medium-quality (Median) MAGs that passed the GUNC criterion on contamination, along with the quality scores (QS, 1k = 1,000) across five real-world datasets.



## Supplementary Figures

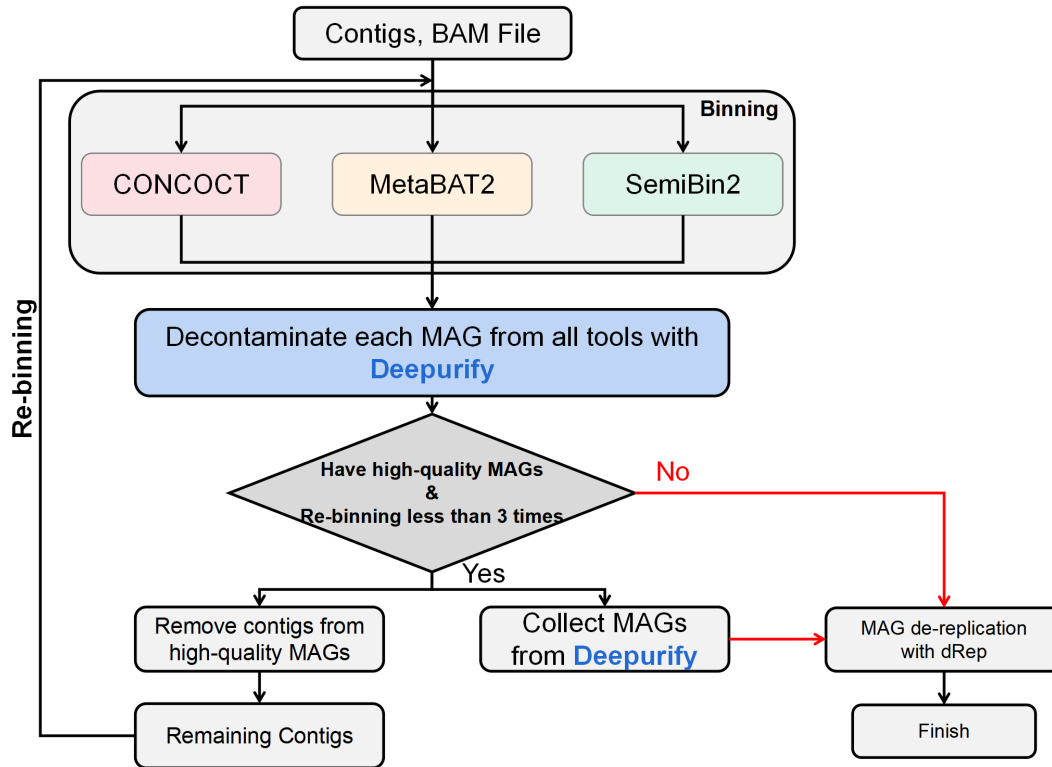

Supplementary Figure 9: The workflow of the iterative decontamination strategy used in Deepurify\_Iter.

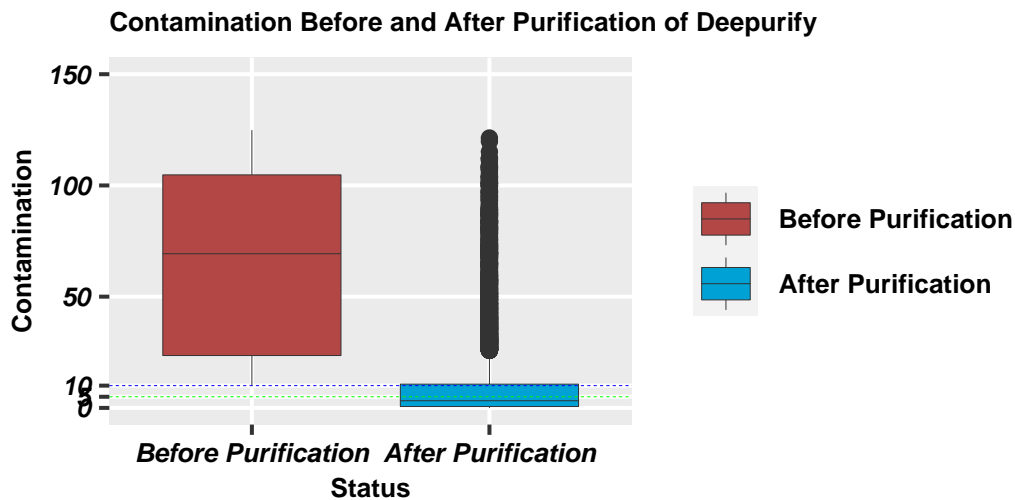

Supplementary Figure 10: Contamination levels of MAGs before (red,  $n = 6,492$ ) and after (blue,  $n = 10,921$ ) applying Deepurify. The analysis included 6,492 highly contaminated MAGs from 251 real-world metagenome sequencing samples. The blue dashed line represents the contamination threshold for medium-quality MAGs, while the green dashed line indicates the threshold for high-quality MAGs. All the box plots depict the median (horizontal line inside box), 25th and 75th percentiles (box), and 25th or 75th percentiles  $\pm 1.5 \times$  interquartile range (whiskers). The other points are outliers.

## References

- [1] Wood, D. E., Lu, J. & Langmead, B. Improved metagenomic analysis with kraken 2. *Genome biology* **20**, 1–13 (2019).
- [2] Sandler, M., Howard, A., Zhu, M., Zhmoginov, A. & Chen, L.-C. Mobilenetv2: Inverted residuals and linear bottlenecks. In *Proceedings of the IEEE conference on computer vision and pattern recognition*, 4510–4520 (2018).
- [3] Nguyen, P. M., Le, T., Nguyen, H. T., Tran, V. & Nguyen, M. L. Phrasetransformer: an incorporation of local context information into sequence-to-sequence semantic parsing. *Applied Intelligence* **53**, 15889–15908 (2023).
- [4] Tan, M. & Le, Q. Efficientnet: Rethinking model scaling for convolutional neural networks. In *International conference on machine learning*, 6105–6114 (PMLR, 2019).
- [5] Li, C., Zhou, A. & Yao, A. Omni-dimensional dynamic convolution. In *International Conference on Learning Representations* (2021).
- [6] Iandola, F. N. *et al.* Squeezenet: Alexnet-level accuracy with 50x fewer parameters and 0.5 mb model size. *arXiv preprint arXiv:1602.07360* (2016).
- [7] Guo, M.-H., Lu, C.-Z., Liu, Z.-N., Cheng, M.-M. & Hu, S.-M. Visual attention network. *arXiv preprint arXiv:2202.09741* (2022).
- [8] Wang, H. *et al.* Deepnet: Scaling transformers to 1,000 layers. *arXiv preprint arXiv:2203.00555* (2022).
- [9] Robinson, J., Chuang, C.-Y., Sra, S. & Jegelka, S. Contrastive learning with hard negative samples. *arXiv preprint arXiv:2010.04592* (2020).
- [10] Lin, T.-Y., Goyal, P., Girshick, R., He, K. & Dollár, P. Focal loss for dense object detection. In *Proceedings of the IEEE international conference on computer vision*, 2980–2988 (2017).
- [11] Huang, G., Sun, Y., Liu, Z., Sedra, D. & Weinberger, K. Q. Deep networks with stochastic depth. In *European conference on computer vision*, 646–661 (Springer, 2016).
- [12] Srivastava, N., Hinton, G., Krizhevsky, A., Sutskever, I. & Salakhutdinov, R. Dropout: a simple way to prevent neural networks from overfitting. *The journal of machine learning research* **15**, 1929–1958 (2014).
- [13] Loshchilov, I. & Hutter, F. Decoupled weight decay regularization. *arXiv preprint arXiv:1711.05101* (2017).

292 [14] Loshchilov, I. & Hutter, F. Sgdr: Stochastic gradient descent with warm restarts. *arXiv preprint*  
293 *arXiv:1608.03983* (2016).
